# Supplementary material
Source: PubMed Central journal article supplement (PMC9468945)
Supplement: jamapediatr-e223172-s001.pdf [file jamapediatr-e223172-s001.pdf]

## Supplemental Online Content

Magee L, Goldsmith LP, Chaudhry UAR, et al. Nonpharmacological interventions to lengthen sleep duration in healthy children: a systematic review and meta-analysis. *JAMA Pediatr*. Published online September 12, 2022. doi:10.1001/jamapediatrics.2022.3172

**eTable 1.** Search strategy used in Medline

**eTable 2.** Detailed table of study characteristics

**eTable 3.** Spreadsheet of study estimates used

This supplementary material has been provided by the authors to give readers additional information about their work.

## **eTable 1. Search strategy used in Medline**

### **Ovid MEDLINE(R) ALL <1946 to November 04, 2019>**

- 1 exp Child/
- 2 exp Pediatrics/
- 3 exp adolescent/
- 4 (paediatric\$ or pediatric\$ or child\$ or adolescen\$ or juvenile\$ or youth\$ or teen\$ or minor\$ or pubescen\$ or prepubescen\$ or boy\$ or girl\$).tw.
- 5 or/1-4
- 6 (sleep\$ adj5 (duration or quality or pattern\$ or improv\$ or increas\$)).tw.
- 7 exp Sleep/ and (duration or quality or pattern\$ or improv\$ or increas\$).tw.
- 8 sleep hygiene/
- 9 (bedtime\$ or bed time\$).tw.
- 10 time in bed.tw.
- 11 sleep time\$.tw.
- 12 or/6-11
- 13 (controlled clinical trial or randomized controlled trial).pt.
- 14 (randomized or randomised).ab,ti.
- 15 placebo.ab,ti.
- 16 dt.fs.
- 17 randomly.ab,ti.
- 18 trial.ab,ti.
- 19 groups.ab,ti.
- 20 or/13-19
- 21 Animals/
- 22 Humans/
- 23 21 not (21 and 22)
- 24 20 not 23
- 25 5 and 12 and 24

### **Embase <1974 to 2019 Week 44>**

- 1 exp Child/
- 2 exp Pediatrics/
- 3 exp adolescent/

- 4 (paediatric\$ or pediatric\$ or child\$ or adolescen\$ or juvenile\$ or youth\$ or teen\$ or minor\$ or pubescen\$ or prepubescen\$ or boy\$ or girl\$).tw.
- 5 or/1-4
- 6 (sleep\$ adj5 (duration or quality or pattern\$ or improv\$ or increas\$)).tw.
- 7 exp Sleep/ and (duration or quality or pattern\$ or improv\$ or increas\$).tw.
- 8 sleep parameters/ or sleep pattern/ or sleep quality/ or sleep time/
- 9 sleep hygiene/
- 10 (bedtime\$ or bed time\$).tw.
- 11 time in bed.tw.
- 12 sleep time\$.tw.
- 13 or/6-12
- 14 5 and 13
- 15 Randomized Controlled Trial/
- 16 randomization/
- 17 controlled clinical trial/
- 18 Double Blind Procedure/
- 19 Single Blind Procedure/
- 20 Crossover Procedure/
- 21 (clinica\$ adj3 trial\$).tw.
- 22 ((singl\$ or doubl\$ or trebl\$ or tripl\$) adj3 (mask\$ or blind\$ or method\$)).tw.
- 23 exp Placebo/
- 24 placebo\$.ti,ab.
- 25 random\$.ti,ab.
- 26 ((control\$ or prospectiv\$) adj3 (trial\$ or method\$ or stud\$)).tw.
- 27 (crossover\$ or cross-over\$).ti,ab.
- 28 or/15-27
- 29 exp animals/ or exp invertebrate/ or animal experiment/ or animal model/ or animal tissue/ or animal cell/ or nonhuman/
- 30 human/ or normal human/ or human cell/
- 31 29 and 30
- 32 29 not 31
- 33 28 not 32
- 34 14 and 33

### PsycINFO <1967 to October Week 4 2019>

- 1 exp PEDIATRICS/
- 2 (paediatric\$ or pediatric\$ or child\$ or adolescen\$ or juvenile\$ or youth\$ or teen\$ or minor\$ or pubescen\$ or prepubescen\$ or boy\$ or girl\$).tw.
- 3 1 or 2
- 4 (sleep\$ adj5 (duration or quality or pattern\$ or improv\$ or increas\$)).tw.
- 5 exp Sleep/ and (duration or quality or pattern\$ or improv\$ or increas\$).tw.
- 6 (bedtime\$ or bed time\$).tw.
- 7 time in bed.tw.
- 8 sleep time\$.tw.
- 9 or/4-8
- 10 3 and 9
- 11 random\$.tw.
- 12 (clinical adj5 trial\$).tw.
- 13 (control\$ adj5 trial\$).tw.
- 14 ((clinical or control\$ or comparativ\$) adj5 (study or studies)).tw.
- 15 placebo\$.tw.
- 16 (single blind\$ or single-blind\$).tw.
- 17 (double blind\$ or double-blind\$).tw.
- 18 (triple blind\$ or triple-blind\$).tw.
- 19 or/11-18
- 20 10 and 19

### CENTRAL (The Cochrane Library Issue 10, 2019)

- #1 MeSH DESCRIPTOR Child Explode All AND CENTRAL:TARGET
- #2 MeSH DESCRIPTOR Pediatrics Explode All AND CENTRAL:TARGET
- #3 MeSH DESCRIPTOR Adolescent AND CENTRAL:TARGET
- #4 paediatric\* or pediatric\* or child\* or adolescen\* or juvenile\* or youth\* or teen\* or minor\* or pubescen\* or prepubescen\* AND CENTRAL:TARGET
- #5 {OR #1-#4}
- #6 (sleep\* NEAR5 (duration or quality or pattern\* or improve\* or increase\*)) AND CENTRAL:TARGET
- #7 MESH DESCRIPTOR Sleep EXPLODE ALL AND CENTRAL:TARGET
- #8 #7 AND (duration or quality or pattern\* or improve\* or increase\*)

#9 #6 OR #8

#10 #5 AND #9

### **Web of Science Core Collection**

#1 TS=(paediatric\* or pediatric\* or child\* or adolescen\* or juvenile\* or youth\* or teen\* or minor\* or pubescen\* or prepubescen\*) OR TI=(paediatric\* or pediatric\* or child\* or adolescen\* or juvenile\* or youth\* or teen\* or minor\* or pubescen\* or prepubescen\*)

#2 TS=(sleep\* NEAR (duration or quality or pattern\* or improve\* or increase\*)) OR TI=(sleep\* NEAR (duration or quality or pattern\* or improve\* or increase\*))

#3 TS=(random\* or placebo\* or trial\* or groups) OR TI=(random\* or placebo\* or trial\* or groups)

#4 #3 AND #2 AND #1

### **ClinicalTrials.gov**

Study type: interventional

Outcome measures: sleep duration

Limits: Child

### **WHO Trials Registry (<https://trialssearch.who.int/>)**

Search terms: sleep duration

Limits: Trials in children





**eTable 3. Spreadsheet of study estimates used**

| Study name (citation)               | Published sleep duration at follow-up (minutes) |       |       |               |       |       | Effect estimates (minutes) |                |                     |       |                   |
|-------------------------------------|-------------------------------------------------|-------|-------|---------------|-------|-------|----------------------------|----------------|---------------------|-------|-------------------|
|                                     | Intervention group                              |       |       | Control group |       |       | Intervention Effect        | Standard Error | Confidence interval |       | Estimation method |
|                                     | Mean                                            | SD    | Total | Mean          | SD    | Total |                            |                | Lower               | Upper |                   |
| Beijamini 2012 <sup>38</sup>        | 411                                             | 67    | 10    | 422           | 50    | 11    | -11.00                     | 26.00          | -61.97              | 39.97 | 1                 |
| Blake 2016 <sup>39</sup>            | 427.34                                          | 38.46 | 63    | 416.85        | 34.55 | 60    | -3.97                      | 5.72           | -15.18              | 7.25  | 2                 |
| Bovi 2021 <sup>40</sup>             |                                                 |       | 18    |               |       | 4     | -20.69                     | 60.13          | -138.56             | 97.17 | 2                 |
| Bovi 2021 contrast 1                | -34.8                                           | 99    | 9     | 0             | 0     | 2     |                            |                |                     |       |                   |
| Bovi 2021 contrast 2                | 70.8                                            | 90    | 9     | 79.8          | 91.2  | 2     |                            |                |                     |       |                   |
| Cain 2011 <sup>41</sup>             | 461.4                                           | 60    | 53    | 466.2         | 54    | 47    | -4.80                      | 11.40          | -27.14              | 17.54 | 1                 |
| Cepni 2021 <sup>42</sup>            | 6.9                                             |       | 24    | -18.2         |       | 26    | -5.60                      | 7.23           | -19.80              | 8.53  | 2                 |
| Dewald-Kaufmann 2013 <sup>43</sup>  | 429                                             | 36    | 28    | 409           | 42    | 27    | 22.80                      | 9.60           | 3.98                | 41.62 | 2                 |
| Dong 2019 <sup>44</sup>             | 436.63                                          | 58.15 | 89    | 430.57        | 60.63 | 87    | -0.75                      | 11.62          | -23.52              | 22.02 | 2                 |
| Haines 2013 <sup>45</sup>           | 33.6                                            | 96    | 55    | -11.4         | 120   | 56    | 45.00                      | 21.12          | 3.60                | 86.40 | 2                 |
| Hammersley 2019 <sup>46</sup>       | 572.4                                           | 38.4  | 21    | 586.8         | 57.6  | 20    | -33.00                     | 15.00          | -60.60              | -1.80 | 2                 |
| Hammersley 2021 <sup>47</sup>       |                                                 |       | 159   |               |       | 81    | -6.00                      | 7.13           | -19.98              | 7.98  | 2                 |
| Hammersley contrast1                | 661.8                                           | 60.6  | 73    | 673.8         | 54.6  | 81    | -6.00                      | 10.10          | -25.80              | 13.80 |                   |
| Hammersley contrast2                | 664.8                                           | 51.6  | 86    | 673.8         | 54.6  | 81    | -6.00                      | 10.10          | -25.80              | 13.80 |                   |
| Hart 2017 <sup>48,49</sup>          | 35                                              | 28    | 38    | -9            | 39    | 38    | 44.00                      | 7.79           | 28.74               | 59.26 | 2                 |
| Hiscock 2019 <sup>50</sup>          | 624.1                                           | 43.9  | 140   | 627.1         | 44.2  | 157   | -0.80                      | 3.85           | -8.30               | 6.80  | 2                 |
| Kalak 2012 <sup>51</sup>            | 434.89                                          | 45.1  | 27    | 406           | 56    | 24    | 28.89                      | 14.35          | 0.76                | 57.02 | 1                 |
| Kira 2014 <sup>52</sup>             | 541                                             | 67    | 15    | 524           | 49    | 14    | 17.00                      | 21.70          | -25.53              | 59.53 | 1                 |
| Knebel 2020 <sup>53</sup>           |                                                 |       | 351   |               |       | 246   | -3.00                      | 9.95           | -22.80              | 16.20 | 2                 |
| Lin 2018 <sup>54</sup>              | 447                                             | 8.4   | 1385  | 391.2         | 12    | 1386  | 28.80                      | 1.80           | 25.27               | 32.33 | 2                 |
| Lufi 2011 <sup>55</sup>             | 451                                             | 19    | 26    | 438           | 19    | 21    | 13.00                      | 5.57           | 2.07                | 23.93 | 1                 |
| Marsh 2020 <sup>56</sup>            | 660                                             | 36    | 25    | 636           | 72    | 26    | 24.00                      | 15.85          | -7.07               | 55.07 | 1                 |
| Mindell 2009 <sup>57</sup>          | 612                                             | 51    | 133   | 612           | 52.2  | 67    | 0.00                       | 8.43           | -16.53              | 16.53 | 1                 |
| Mindell 2016 <sup>58</sup>          | 611.4                                           | 73.2  | 56    | 593.4         | 58.2  | 53    | 18.00                      | 12.63          | -6.76               | 42.76 | 1                 |
| Mitchell 2021 Study 1 <sup>59</sup> |                                                 |       | 14    |               |       | 8     | 26.53                      | 11.96          | 3.09                | 49.96 | 2                 |
| Mitchell 2021 Study1 GF             | 510.6                                           |       | 6     | 489.6         |       | 4     | 33.00                      |                | -0.60               | 66.60 |                   |
| Mitchell 2021 Study 1LF             | 523.6                                           |       | 8     | 489.6         |       | 4     | 20.40                      |                | -12.00              | 53.40 |                   |
| Mitchell 2021 Study 2 <sup>59</sup> |                                                 |       | 28    |               |       | 9     | -9.40                      | 10.14          | -11.09              | 29.11 | 2                 |
| Mitchell Study 2 LF                 |                                                 |       | 8     |               |       | 3     | -13.20                     |                | -48.60              | 22.20 |                   |
| Mitchell Study 2 LF + NFB           |                                                 |       | 9     |               |       | 3     | -13.80                     |                | -51.60              | 0.41  |                   |



| Study name (citation)                   | Published sleep duration at follow-up (minutes) |          |       |               |          |       | Effect estimates (minutes) |                |                     |       |                   |
|-----------------------------------------|-------------------------------------------------|----------|-------|---------------|----------|-------|----------------------------|----------------|---------------------|-------|-------------------|
|                                         | Intervention group                              |          |       | Control group |          |       | Intervention Effect        | Standard Error | Confidence interval |       | Estimation method |
|                                         | Mean                                            | SD       | Total | Mean          | SD       | Total |                            |                | Lower               | Upper |                   |
| Mitchell Study 2 NFB                    |                                                 |          | 11    |               |          | 3     | -3.60                      |                | -34.80              | 27.00 |                   |
| Moore 2019 Healthy Change <sup>60</sup> |                                                 |          | 118   |               |          | 60    | 0.23                       | 3.83           | -7.27               | 7.73  | 2                 |
| Moore 2019 System Change <sup>60</sup>  |                                                 |          | 123   |               |          | 59    | 2.95                       | 3.03           | -2.99               | 8.88  | 2                 |
| Morell-Azanza 2019 <sup>61</sup>        | 526.42                                          | 72.53    | 79    | 516.62        | 141.58   | 27    | 9.80                       | 28.44          | -45.95              | 65.55 | 1                 |
| Moseley 2009 <sup>62</sup>              | 464.4                                           | 60       | 34    | 465.6         | 42       | 32    | -1.20                      | 12.69          | -26.07              | 23.67 | 1                 |
| Moula 2020 <sup>63</sup>                | 489.79                                          | 46.02    | 28    | 464.4         | 71.6     | 28    | 25.39                      | 16.09          | -6.14               | 56.92 | 2                 |
| Mousarrezai 2020 <sup>64</sup>          | 564.86                                          | 35.44    | 47    | 528.96        | 52.2     | 45    | 29.14                      | 8.44           | 12.59               | 45.69 | 2                 |
| Pablos 2018 <sup>65</sup>               | 570                                             | 42       | 82    | 582           | 42       | 76    | -0.66                      | 6.69           | -13.20              | 12.00 | 2                 |
| Puder 2011 <sup>66</sup>                | 654                                             | 35.1289  | 333   | 653.88        | 35.1289  | 292   | 0.12                       | 2.82           | -5.40               | 5.64  | 2                 |
| Quach 2018 <sup>67</sup>                | 631.2                                           | 39.6     | 205   | 630           | 54       | 205   | 1.20                       | 4.68           | -7.97               | 10.37 | 1                 |
| Rigney 2015 <sup>68</sup>               | 475                                             | 60       | 88    | 474           | 64       | 87    | 1.00                       | 9.38           | -17.39              | 19.39 | 1                 |
| Santiago 2020 <sup>69</sup>             | 414                                             | 12       | 18    | 408           | 6        | 12    | 6.00                       | 3.32           | -0.50               | 12.50 | 1                 |
| Sousa 2013 <sup>70</sup>                | 436                                             | 73       | 18    | 425           | 95       | 16    | 11.00                      | 29.33          | -46.48              | 68.48 | 1                 |
| Sundgot-Borgen 2019 <sup>71</sup>       |                                                 |          | 615   |               |          | 284   | 14.20                      | 4.94           | 4.52                | 23.88 | 2                 |
| Sundot Borgen 2019 Boys Weekday         | 411                                             | 70.2069  | 182   | 384           | 72.81066 | 87    | 27.60                      | 9.49           | 9.00                | 46.20 |                   |
| Sundot Borgen 2019 Girls Weekday        | 406.8                                           | 63.69996 | 433   | 397.8         | 68.74613 | 197   | 9.00                       | 5.82           | -2.40               | 20.40 |                   |
| Tamura 2014 <sup>72</sup>               |                                                 |          | 72    |               |          | 76    | 13.77                      | 6.87           | 0.30                | 27.24 | 1                 |
| Tamura 2014 Grade 4 Boys                | 522                                             | 51.3     | 13    | 514           | 15.5     | 15    | 8.00                       | 14.78          | -20.97              | 36.97 |                   |
| Tamura 2014 Grade 4 Girls               | 526                                             | 19.8     | 13    | 512           | 39       | 11    | 14.00                      | 12.98          | -11.44              | 39.44 |                   |
| Tamura 2014 Grade 5 Boys                | 483                                             | 57.4     | 10    | 477           | 36.6     | 11    | 6.00                       | 21.24          | -35.64              | 47.64 |                   |
| Tamura 2014 Grade 5 Girls               | 505                                             | 48       | 11    | 474           | 31.5     | 14    | 31.00                      | 16.74          | -1.82               | 63.82 |                   |
| Tamura 2014 Grade 6 Boys                | 506                                             | 29.8     | 17    | 482           | 74       | 13    | 24.00                      | 21.69          | -18.51              | 66.51 |                   |
| Tamura 2014 Grade 6 Girls               | 491                                             | 47.9     | 8     | 492           | 29.9     | 12    | -1.00                      | 19.01          | -38.25              | 36.25 |                   |
| Tamura 2016 <sup>73</sup>               | 477.25                                          | 57.69    | 122   | 444.42        | 65.52    | 121   | 32.83                      | 7.92           | 17.30               | 48.36 | 1                 |
| Taylor 2015 <sup>74</sup>               | 564                                             | 30.8847  | 89    | 564           | 30.8847  | 92    | 0.00                       | 4.59           | -9.00               | 9.00  | 2                 |
| Tomayko 2019 <sup>75</sup>              | 606                                             | 52.2     | 188   | 608.4         | 58.2     | 188   | -2.40                      | 5.70           | -13.61              | 8.81  | 1                 |
| Uhlig 2019 <sup>76</sup>                | 479.47                                          | 35.84    | 52    | 468.11        | 35.98    | 23    | 11.36                      | 9.00           | -6.28               | 29.00 | 1                 |
| Van Dyk 2017 <sup>77</sup>              | 442.2                                           | 24.9415  | 27    | 369.9         | 24.9415  | 27    | 72.30                      | 6.79           | 59.00               | 85.60 | 1                 |
| Van Rijn 2020 <sup>78</sup>             | 359.4                                           | 45.6     | 97    | 358.8         | 47.4     | 108   | 0.60                       | 6.50           | -12.14              | 13.34 | 1                 |
| Walton 2015 <sup>79</sup>               | 744                                             | 25.2     | 27    | 744           | 34.2     | 21    | -3.18                      | 9.95           | -22.80              | 16.20 | 2                 |

| Study name (citation)      | Published sleep duration at follow-up (minutes) |    |       |               |    |       | Effect estimates (minutes) |                |                     |       |                   |
|----------------------------|-------------------------------------------------|----|-------|---------------|----|-------|----------------------------|----------------|---------------------|-------|-------------------|
|                            | Intervention group                              |    |       | Control group |    |       | Intervention Effect        | Standard Error | Confidence interval |       | Estimation method |
|                            | Mean                                            | SD | Total | Mean          | SD | Total |                            |                | Lower               | Upper |                   |
| Wilson 2014 <sup>80</sup>  | 660                                             | 54 | 45    | 624           | 54 | 42    | 36.00                      | 11.59          | 13.29               | 58.71 | 2                 |
| Wing 2015 <sup>81</sup>    | 437                                             |    | 1545  | 434           |    | 2168  | 3.00                       | 1.53           | 0.00                | 6.00  | 2                 |
| Wolfson 2015 <sup>82</sup> | 13                                              | 58 | 73    | -12           | 43 | 70    | 25.00                      | 8.57           | 8.06                | 41.94 | 2                 |
| Yoong 2018 <sup>83</sup>   | 672                                             | 78 | 14    | 642           | 60 | 15    | 54.00                      | 21.43          | 12.00               | 96.00 | 2                 |

Footnotes

Estimation method code 1: intervention effect determined from differences at follow-up between intervention and control groups in RevMan using means, SDs and sample size for intervention and control groups

Estimation method code 2: intervention effect is obtained from published estimates reporting change in the intervention group adjusted for change in the control group that used ANCOVA/repeated measures ANOVA/mixed models/multilevel models

Subgroups within the same study (shaded rows) were combined first using fixed effects meta-analysis for pooling with other studies
